# Supplementary material for: Controlled Surface Modification of Polyamide 6.6 Fibres Using CaCl2/H2O/EtOH Solutions
Source: MDPI journal article supplement (doi:10.3390/polym10020207), 2018-02-21
Supplement: s1 [file s1]

# Controlled surface modification of polyamide 6.6 fibres using $\text{CaCl}_2/\text{H}_2\text{O}/\text{EtOH}$ solutions

Barbara Rietzler, Thomas Bechtold, Tung Pham\*

Research Institute of Textile Chemistry and Textile Physics, Leopold-Franzens University Innsbruck, Höchsterstraße 73, 6850 Dornbirn, Austria; [textilchemie@uibk.ac.at](mailto:textilchemie@uibk.ac.at)

\* Correspondence: [tung.pham@uibk.ac.at](mailto:tung.pham@uibk.ac.at); Tel.: +43 5572 28533 0

## Supplementary Materials:

**Table S1:** Results of diameter measurements and the changes of the diameter in % for PA 6.6 fibres in SW;  
D<sub>o</sub> – outer diameter, D<sub>c</sub> – diameter of core,  $\sigma$  – standard deviation,  $\Delta$  – difference of diameter at the beginning and after the treatment (in-situ experiments)

| Time<br>[min] | D <sub>o</sub><br>[ $\mu\text{m}$ ] | $\sigma$ D <sub>o</sub><br>[ $\mu\text{m}$ ] | D <sub>c</sub><br>[ $\mu\text{m}$ ] | $\sigma$ D <sub>c</sub><br>[ $\mu\text{m}$ ] | $\Delta$ D <sub>o</sub><br>[%] | $\sigma\Delta$ D <sub>o</sub><br>[%] | $\Delta$ D <sub>c</sub><br>[%] | $\sigma\Delta$ D <sub>c</sub><br>[%] |
|---------------|-------------------------------------|----------------------------------------------|-------------------------------------|----------------------------------------------|--------------------------------|--------------------------------------|--------------------------------|--------------------------------------|
| 0             | 15.6                                | 0.8                                          |                                     |                                              |                                |                                      |                                |                                      |
| 5             | 23.1                                | 1.7                                          | 13.1                                | 0.7                                          | 47.5                           | 4.9                                  | -16.1                          | 4.2                                  |
| 10            | 27.6                                | 1.6                                          | 10.3                                | 1.2                                          | 77.0                           | 7.5                                  | -34.2                          | 6.7                                  |
| 15            | 29.7                                | 1.6                                          | 7.7                                 | 1.1                                          | 90.4                           | 4.2                                  | -50.4                          | 7.7                                  |
| 20            | 31.3                                | 1.6                                          | 5.2                                 | 2.3                                          | 100.4                          | 5.4                                  | -66.8                          | 14.8                                 |
| 25            | 32.1                                | 1.4                                          | 3.9                                 | 1.1                                          | 105.9                          | 1.7                                  | -85.2                          | 13.0                                 |

**Table S2:** Results of diameter measurements and the changes of the diameter in % for PA 6.6 fibres in DISS;  
D<sub>o</sub> – outer diameter, D<sub>c</sub> – diameter of core,  $\sigma$  – standard deviation,  $\Delta$  – difference of diameter at the beginning and after the treatment (in-situ experiments)

| Time<br>[min] | D<br>[ $\mu\text{m}$ ] | $\sigma$ D<br>[ $\mu\text{m}$ ] | $\Delta$ D<br>[%] | $\sigma \Delta$ D<br>[%] |
|---------------|------------------------|---------------------------------|-------------------|--------------------------|
| 0             | 15.6                   | 0.8                             | 0.0               | 0.0                      |
| 5             | 14.5                   | 0.8                             | -4.3              | 1.2                      |
| 10            | 13.3                   | 0.9                             | -12.1             | 1.7                      |
| 15            | 12.6                   | 1.0                             | -17.2             | 2.8                      |
| 20            | 11.3                   | 0.9                             | -25.2             | 2.9                      |
| 25            | 10.6                   | 1.1                             | -30.2             | 4.2                      |
| 30            | 9.2                    | 1.5                             | -39.0             | 6.5                      |
| 35            | 8.1                    | 1.4                             | -46.6             | 6.6                      |
| 40            | 7.2                    | 1.6                             | -52.7             | 8.1                      |
| 45            | 5.8                    | 1.7                             | -62.0             | 9.3                      |
| 50            | 4.3                    | 2.0                             | -71.7             | 11.1                     |

**Table S3:** Results of diameter measurements and the changes of the diameter in %.for PA 6.6 fibres in SW after washing;  $D_o$  – outer diameter,  $D_c$  – diameter of core,  $\sigma$  – standard deviation,  $\Delta$  – difference of diameter at the beginning and after the treatment (ex-situ experiments)

| Time<br>[min] | $D_o$<br>[ $\mu\text{m}$ ] | $\sigma D_o$<br>[ $\mu\text{m}$ ] | $D_c$<br>[ $\mu\text{m}$ ] | $\sigma D_c$<br>[ $\mu\text{m}$ ] | $\Delta D_o$<br>[%] | $\sigma \Delta D_o$<br>[%] | $\Delta D_c$<br>[%] | $\sigma \Delta D_c$<br>[%] |
|---------------|----------------------------|-----------------------------------|----------------------------|-----------------------------------|---------------------|----------------------------|---------------------|----------------------------|
| 0             | 15.7                       | 0.4                               | 15.7                       | 0.4                               | 0.0                 | 0.0                        | 0.0                 | 0.0                        |
| 5             | 18.7                       | 2.3                               | 10.8                       | 1.6                               | 19.7                | 14.3                       | -31.2               | -10.0                      |
| 10            | 21.9                       | 3.9                               | 7.9                        | 1.7                               | 39.6                | 24.8                       | -49.4               | -10.8                      |
| 15            | 24.3                       | 3.6                               | 6.6                        | 4.0                               | 55.2                | 22.7                       | -57.8               | -25.4                      |

**Table S4:** Results of diameter measurements and the changes of the diameter in %.for PA 6.6 fibres in DISS after washing;  $D$  – diameter,  $\sigma$  – standard deviation,  $\Delta$  – difference of diameter at the beginning and after the treatment (ex-situ experiments)

| Time<br>[min] | $D$<br>[ $\mu\text{m}$ ] | $\sigma D$<br>[ $\mu\text{m}$ ] | $\Delta D$<br>[%] | $\sigma \Delta D$<br>[%] |
|---------------|--------------------------|---------------------------------|-------------------|--------------------------|
| 0             | 15.7                     | 0.4                             | 0.0               | 0.0                      |
| 5             | 14.5                     | 1.1                             | -7.7              | 6.9                      |
| 10            | 12.7                     | 0.7                             | -18.9             | 4.6                      |
| 15            | 11.4                     | 1.2                             | -27.1             | 7.4                      |
| 20            | 10.2                     | 1.0                             | -35.2             | 5.9                      |
| 25            | 8.7                      | 0.9                             | -44.6             | 5.5                      |
| 30            | 7.3                      | 0.7                             | -53.3             | 4.6                      |
| 35            | 4.3                      | 0.4                             | -72.3             | 2.6                      |
